# Supplementary material
Source: HighWire-hosted journal article supplement (http://www.qdcxjkg.com/highwire/filestream/113661/field_highwire_adjunct_files/0/ERJ-01148-2012_Disclosure.pdf)
Supplement: ERJ-01148-2012_Disclosure.pdf [file ERJ-01148-2012_Disclosure.pdf]

Jan-Willem C. Alffenaar has received an educational grant from Pfizer, MSD and Schering-Plough for organising symposia on antifungal treatment. He has also received research funding from Pfizer, MSD and Astellas.
